# Supplementary material for: A Novel Approach for the Discovery of Biomarkers of Radiotherapy Response in Breast Cancer
Source: J Pers Med. 2021 Aug 14;11(8):796. doi: 10.3390/jpm11080796 (PMC8399231; doi:10.3390/jpm11080796)
Supplement: Supplementary file 1 [file jpm-11-00796-s001.zip]

Archive with 11 entries (11 files):
- Supplementary Figure S1.tif
- Supplementary Figure S2.tif
- Supplementary Figure S3.tif
- Supplementary Figure S4.tif
- Supplementary Figure S5.tif
- Supplementary Figure S6.tif
- Supplementary Figure S7.tif
- Supplementary Table S1.pdf
- Supplementary Table S2.pdf
- Supplementary Table S3.pdf
- Supplementary Table S4.pdf
