# Supplementary material for: A Novel Approach for the Discovery of Biomarkers of Radiotherapy Response in Breast Cancer
Source: J Pers Med. 2021 Aug 14;11(8):796. doi: 10.3390/jpm11080796 (PMC8399231; doi:10.3390/jpm11080796)
Supplement: Supplementary file 1 [file jpm-11-00796-s001.zip › Supplementary Table S2.pdf]

|                                 |                           |
|---------------------------------|---------------------------|
| <b>Patient Age</b>              | Mean 65.2 (range 35-91)   |
|                                 |                           |
| <b>Grading Characteristic</b>   | <b>Number of Patients</b> |
| <b>Histological Grade</b>       |                           |
| 1                               | 30                        |
| 2                               | 37                        |
| 3                               | 13                        |
| <b>ER Status (Allred Score)</b> |                           |
| 6                               | 18                        |
| 7                               | 42                        |
| 8                               | 20                        |
| <b>PgR Status</b>               |                           |
| 6                               | 10                        |
| 7                               | 21                        |
| 8                               | 20                        |
| Unknown                         | 29                        |
| <b>Lymph Node Status</b>        |                           |
| Positive                        | 18                        |
| Negative                        | 62                        |
| <b>T stage (TNM)</b>            |                           |
| T1                              | 51                        |
| T2                              | 29                        |
| <b>Surgery</b>                  |                           |
| Breast conserving surgery (WLE) | 80                        |
| Mastectomy                      | 0                         |
| <b>Adjuvant Treatment</b>       |                           |
| Chemotherapy                    | 0                         |
| Endocrine therapy               | 0                         |
| Radiotherapy                    | 80                        |

**Supplementary Table S2.** Clinicopathological data from 80 patients within the Breast-Conserving Series that were used to investigate whether the candidate biomarkers could predict response to RT.
