# Supplementary material for: A Novel Approach for the Discovery of Biomarkers of Radiotherapy Response in Breast Cancer
Source: J Pers Med. 2021 Aug 14;11(8):796. doi: 10.3390/jpm11080796 (PMC8399231; doi:10.3390/jpm11080796)
Supplement: Supplementary file 1 [file jpm-11-00796-s001.zip › Supplementary Table S3.pdf]

| All Secreted Proteins | Secreted Proteins in the known Interactome | Metabolic Pathways | Carbohydrate Metabolism | Cell Cycle | Immune   |
|-----------------------|--------------------------------------------|--------------------|-------------------------|------------|----------|
| LRRCC1                | RPL11                                      | ABAT               | ACO2                    | DYNC1LI2   | ACLY     |
| ASS1                  | RPSA                                       | ACACA              | ADH5                    | GORASP2    | ACTB     |
| CTSB                  | GART                                       | ACLY               | ALDOA                   | LMNB1      | ACTG1    |
| CKAP4                 | TKT                                        | ACO2               | ALDOC                   | MAPRE1     | ALDOA    |
| PLS3                  | GPI                                        | ADH5               | CS                      | NUP37      | ALDOC    |
| KIF5A                 | SUMO1                                      | ADII               | DLD                     | PCNA       | APEH     |
| TBCA                  | PSMA7                                      | ADK                | ENO1                    | PPP1CB     | APRT     |
| CTSD                  | TPI1                                       | ADSS               | ENO2                    | PPP1CC     | B2M      |
| PFN2                  | LSM2                                       | AKR1A1             | ESD                     | PSMA7      | BLMH     |
| MIPOL1                | ACACA                                      | ALDH9A1            | FBP1                    | PSMB1      | BOLA2    |
| ALDOA                 | KRT8                                       | ALDOA              | FBP2                    | RBBP4      | CALM1    |
| DLD                   | IDI1                                       | ALDOC              | FH                      | RCC2       | CFL1     |
| SORD                  | RAN                                        | APRT               | G6PD                    | RRM2       | CKAP4    |
| TPD52L2               | HSPD1                                      | ASS1               | GAPDH                   | SFN        | COTL1    |
| MIF                   | GNB2L1                                     | ATIC               | GCSH                    | SUMO1      | CPPED1   |
| MAT2B                 | FH                                         | BLVRB              | GOT2                    | UBE2I      | CSTB     |
| KRT19                 | FDPS                                       | BPNT1              | GPI                     | UBE2V2     | CTSB     |
| ADII                  | HSPA5                                      | CBR1               | IDH1                    | YWHAB      | CTSD     |
| PA2G4                 | FASN                                       | CBR3               | MDH1                    | YWHAE      | DYNC1LI2 |
| LMAN2                 | MDH1                                       | CKMT1A             | MDH2                    | YWHAG      | EIF4A1   |
| DDB1                  | CS                                         | CMBL               | ME1                     | YWHAH      | FABP5    |
| EML2                  | SHMT2                                      | CNDP2              | PGAM1                   | YWHAQ      | FKBP1A   |
| F11                   | SHMT1                                      | COX17              | PGD                     | YWHAZ      | FLNA     |
| HMGNI                 | SUMO2                                      | COX4I1             | PGK1                    |            | FLNB     |
| ALDOC                 | TXNRD1                                     | CS                 | PGLS                    |            | GDI2     |
| PGM2                  | ADII                                       | DCTPP1             | PGP                     |            | GPI      |
| VIM                   | PKM                                        | DLD                | PKM                     |            | GSTO1    |
| YWHAH                 | PGK1                                       | DUT                | PSAT1                   |            | GYG1     |
| SH3BGRL               | APRT                                       | ENO1               | SHMT1                   |            | HEBP2    |
| DDAH1                 | ALDOA                                      | ENO2               | SHMT2                   |            | HIF1A    |
| GNPNAT1               | MAT2B                                      | ENOPH1             | TALDO1                  |            | HSPA5    |
| SHMT2                 | ACTB                                       | FAH                | TKT                     |            | HSPA8    |
| TARS                  | PGD                                        | FAHD1              | TPI1                    |            | IDH1     |
| GORASP2               | MDH2                                       | FASN               |                         |            | KIF5A    |
| SERF2                 | ESD                                        | FBP1               |                         |            | KRT1     |
| DNAJC9                | TXN                                        | FBP2               |                         |            | LMNB1    |
| TPT1                  | PGAM1                                      | FDPS               |                         |            | LTA4H    |
| LDHA                  | GCSH                                       | FH                 |                         |            | MIF      |
| RPL11                 | EIF4A1                                     | G6PD               |                         |            | MSN      |
| SFN                   | AIMP1                                      | GAPDH              |                         |            | MYH9     |
| MTPN                  | PNP                                        | GART               |                         |            | NIT2     |

|          |         |        |  |  |         |
|----------|---------|--------|--|--|---------|
| HMGN2    | G6PD    | GCLC   |  |  | NPEPPS  |
| G6PD     | UBE2V2  | GCSH   |  |  | NUP37   |
| DDAH2    | TALDO1  | GNPDA1 |  |  | PA2G4   |
| RBBP9    | GSR     | GOT2   |  |  | PDAP1   |
| CALM1    | NAGK    | GPI    |  |  | PDIA3   |
| PKM      | GCLC    | GSS    |  |  | PGAM1   |
| ACTG1    | ASS1    | GYG1   |  |  | PGM2    |
| NUP37    | ENO2    | HPRT1  |  |  | PKM     |
| KRT18    | ADSS    | IDH1   |  |  | PNP     |
| ANXA3    | EIF2S2  | IDI1   |  |  | POLR2H  |
| LAMB1    | IDH1    | IMPA1  |  |  | PPIA    |
| PPP2R4   | ACTN4   | LAP3   |  |  | PRDX6   |
| SH3BGR13 | ME1     | LDHA   |  |  | PSMA7   |
| FDPS     | HSPA8   | LTA4H  |  |  | PSMB1   |
| ISOC1    | ENO1    | MAT2A  |  |  | RAPGEF4 |
| CBR3     | GDI2    | MAT2B  |  |  | S100A11 |
| DNASE2   | FBP1    | MDH1   |  |  | SOD1    |
| HIST1H4A | LDHA    | MDH2   |  |  | SUMO1   |
| KRT8     | FAH     | ME1    |  |  | TALDO1  |
| EIF4A1   | ALDH9A1 | MVD    |  |  | TCEB2   |
| HN1L     | PCNA    | NAGK   |  |  | THOP1   |
| APEH     | GNPDA1  | NANS   |  |  | TXN     |
| HEBP2    | GAPDH   | NME2   |  |  | UBE2V2  |
| ME1      | CFL1    | OAT    |  |  | VCL     |
| GSS      | PPIH    | PFAS   |  |  | VIM     |
| CFL1     | PFAS    | PGAM1  |  |  | YWHAB   |
| FANCD2   | ACLY    | PGD    |  |  | YWHAZ   |
| KRT2     | GDI1    | PGK1   |  |  |         |
| CMBL     | UBE2I   | PGLS   |  |  |         |
| PFN1     | TPT1    | PGM2   |  |  |         |
| PRRC2C   | PGM2    | PGP    |  |  |         |
| PPIH     | MAPRE1  | PKM    |  |  |         |
| DTD1     | FBP2    | PNP    |  |  |         |
| FASN     | NUP37   | POLR2H |  |  |         |
| PGK1     | ACTG1   | PRDX6  |  |  |         |
| NAPA     | DUT     | PSAT1  |  |  |         |
| GART     | WDR5    | RRM2   |  |  |         |
| FBP1     | KRT18   | SHMT1  |  |  |         |
| NUDT2    | EIF2A   | SHMT2  |  |  |         |
| C1orf123 | YWHAG   | SORD   |  |  |         |
| GDI1     | HIF1A   | TALDO1 |  |  |         |
| TXN      | CTSB    | TKT    |  |  |         |

|         |        |       |  |  |  |
|---------|--------|-------|--|--|--|
| WDR5    | ABAT   | TPI1  |  |  |  |
| REXO2   | CALU   | TSTA3 |  |  |  |
| TMSB4X  | CSTB   |       |  |  |  |
| NAGK    | AKR1A1 |       |  |  |  |
| TRIM28  | GLRX   |       |  |  |  |
| NIT2    | PARK7  |       |  |  |  |
| GOT2    | KIF5A  |       |  |  |  |
| TTN     | HPRT1  |       |  |  |  |
| SCRN1   | B2M    |       |  |  |  |
| HRSP12  | HMGNI  |       |  |  |  |
| CS      | ALB    |       |  |  |  |
| S100A11 | RBBP4  |       |  |  |  |
| PPIA    | PPIL1  |       |  |  |  |
| IDI1    | POLR2H |       |  |  |  |
| OVCA2   | YWHAZ  |       |  |  |  |
| PNP     | WDR12  |       |  |  |  |
| TP53I3  | YWHAB  |       |  |  |  |
| PSMA7   | KRT2   |       |  |  |  |
| FH      | CMPK1  |       |  |  |  |
| GCSH    | EIF4H  |       |  |  |  |
| OTUB1   | RRM2   |       |  |  |  |
| ESD     | YWHAQ  |       |  |  |  |
| CLIC1   | CTTN   |       |  |  |  |
| PGAM1   | NME2   |       |  |  |  |
| CSDE1   | GOT2   |       |  |  |  |
| PHPT1   | TCEB2  |       |  |  |  |
| UBE2I   | FABP5  |       |  |  |  |
| PDLIM1  | KRT19  |       |  |  |  |
| ENO1    | TTN    |       |  |  |  |
| EIF2A   | KRT10  |       |  |  |  |
| AAMP    | LSM3   |       |  |  |  |
| PROSC   | ZNF300 |       |  |  |  |
| UBE2L3  | PRDX6  |       |  |  |  |
| GLO1    | PPP2R4 |       |  |  |  |
| PPIB    | HSPH1  |       |  |  |  |
| PCBD1   | GRPEL1 |       |  |  |  |
| NLN     | KRT1   |       |  |  |  |
| COX4I1  | GGCT   |       |  |  |  |
| DPYSL2  | LAP3   |       |  |  |  |
| MDH1    | NIT2   |       |  |  |  |
| GNPDA1  | CTSD   |       |  |  |  |
| GDI2    | COX17  |       |  |  |  |

|          |          |  |  |  |  |
|----------|----------|--|--|--|--|
| FLNB     | HEBP2    |  |  |  |  |
| YWHAZ    | TARS     |  |  |  |  |
| LSM3     | TMSB4X   |  |  |  |  |
| BLMH     | PPP1CB   |  |  |  |  |
| KRT10    | YWHAE    |  |  |  |  |
| GPI      | CNDP2    |  |  |  |  |
| TKT      | CKAP4    |  |  |  |  |
| PIR      | HSPA4    |  |  |  |  |
| PGLS     | CPPED1   |  |  |  |  |
| RBBP4    | LTA4H    |  |  |  |  |
| WDR12    | PPP1CC   |  |  |  |  |
| RAN      | PIR      |  |  |  |  |
| CMPK1    | PA2G4    |  |  |  |  |
| ACACA    | PEBP1    |  |  |  |  |
| RAPGEF4  | RCC2     |  |  |  |  |
| NME2     | NUDT2    |  |  |  |  |
| CSTB     | PFN2     |  |  |  |  |
| C19orf10 | SFN      |  |  |  |  |
| LTA4H    | LMAN2    |  |  |  |  |
| PRDX6    | DYNC1LI2 |  |  |  |  |
| RRM2     | VPS29    |  |  |  |  |
| SPINT2   | RAPGEF4  |  |  |  |  |
| FAHD1    | TFRC     |  |  |  |  |
| DENR     | YWHAH    |  |  |  |  |
| PGD      | FANCD2   |  |  |  |  |
| HSPB1    | OLA1     |  |  |  |  |
| HMCN1    | EIF6     |  |  |  |  |
| HSPA4    | FAHD1    |  |  |  |  |
| SUMO2    | MSN      |  |  |  |  |
| CTTN     | PFN1     |  |  |  |  |
| HIF1A    | SOD1     |  |  |  |  |
| TXNL1    | ADK      |  |  |  |  |
| GRPEL1   | GSTO1    |  |  |  |  |
| UBE2V2   | GSTM3    |  |  |  |  |
| LSM2     | PSAT1    |  |  |  |  |
| TFRC     | FLNB     |  |  |  |  |
| ACTB     | CBR3     |  |  |  |  |
| TXNRD1   | FLNA     |  |  |  |  |
| YWHAG    | MTPN     |  |  |  |  |
| ADSS     | GLO1     |  |  |  |  |
| HSPD1    | ANXA5    |  |  |  |  |
| GCLC     | ACO2     |  |  |  |  |

|                 |                 |  |  |  |  |
|-----------------|-----------------|--|--|--|--|
| DBI             | PPIA            |  |  |  |  |
| RPSA            | KARS            |  |  |  |  |
| GLOD4           | PLEC            |  |  |  |  |
| PPIF            | ERH             |  |  |  |  |
| NRBP1           | CALM1           |  |  |  |  |
| PCMT1           | COX4I1          |  |  |  |  |
| PTMA            | ENSG00000160200 |  |  |  |  |
| ANXA5           | TMA7            |  |  |  |  |
| FKBP4           | PLS3            |  |  |  |  |
| NUTF2           | DTD1            |  |  |  |  |
| FBP2            | PDIA3           |  |  |  |  |
| TP11            | NPEPL1          |  |  |  |  |
| PCNA            | DNPEP           |  |  |  |  |
| NEDD8-MDP1      | WDR1            |  |  |  |  |
| ALB             | RPL19           |  |  |  |  |
| EIF4H           | ATIC            |  |  |  |  |
| EPPK1           | PSMB1           |  |  |  |  |
| FKBP1A          | MVD             |  |  |  |  |
| TSTA3           | NUTF2           |  |  |  |  |
| SUMO1           | ENOPH1          |  |  |  |  |
| HSPA4L          | MAT2A           |  |  |  |  |
| HSPB11          | PGLS            |  |  |  |  |
| LAP3            | ADH5            |  |  |  |  |
| PPIL1           | DLD             |  |  |  |  |
| OLA1            | GSS             |  |  |  |  |
| NT5DC1          | GNPNAT1         |  |  |  |  |
| ENSG00000124208 | ALDOC           |  |  |  |  |
| DNPEP           | VCL             |  |  |  |  |
| GLRX            | HSPB1           |  |  |  |  |
| PGP             | ARHGDIA         |  |  |  |  |
| TSN             | DDB1            |  |  |  |  |
| APRT            | FKBP4           |  |  |  |  |
| GNB2L1          | APEX1           |  |  |  |  |
| ECI1            | HMG2            |  |  |  |  |
| ENO2            | HSPA4L          |  |  |  |  |
| DSTN            | TRIM28          |  |  |  |  |
| SOD1            | AAMP            |  |  |  |  |
| SELENBP1        | PPIL3           |  |  |  |  |
| ALDH9A1         | MIF             |  |  |  |  |
| FAH             | LAMB1           |  |  |  |  |
| NIF3L1          | KRT9            |  |  |  |  |
| KARS            | VIM             |  |  |  |  |

|                 |         |  |  |  |  |
|-----------------|---------|--|--|--|--|
| ERH             | DCTPP1  |  |  |  |  |
| LXN             | LMNB1   |  |  |  |  |
| KRT1            | PPP1CA  |  |  |  |  |
| ZNF300          | OAT     |  |  |  |  |
| MYH9            | NAPA    |  |  |  |  |
| ABAT            | MYH9    |  |  |  |  |
| S100A13         | DNASE2  |  |  |  |  |
| ENSG00000160200 | PIIB    |  |  |  |  |
| CNDP2           | DNAJC9  |  |  |  |  |
| AKR1A1          | CBR1    |  |  |  |  |
| EIF2S2          | CLIC1   |  |  |  |  |
| VPS29           | SORD    |  |  |  |  |
| HN1             | PTMA    |  |  |  |  |
| LGALS3BP        | PEPD    |  |  |  |  |
| PPP1CA          | SH3BGRL |  |  |  |  |
| THOP1           | DTD2    |  |  |  |  |
| GSTM3           | RBBP9   |  |  |  |  |
| FLNA            | DENR    |  |  |  |  |
| TMA7            | DSTN    |  |  |  |  |
| PPP1CB          | ACYP1   |  |  |  |  |
| GSR             | TXNL1   |  |  |  |  |
| ARHGDIA         |         |  |  |  |  |
| MAPRE1          |         |  |  |  |  |
| GAPDH           |         |  |  |  |  |
| RPL19           |         |  |  |  |  |
| EIF6            |         |  |  |  |  |
| HSPH1           |         |  |  |  |  |
| PDIA3           |         |  |  |  |  |
| TATDN1          |         |  |  |  |  |
| YWHAE           |         |  |  |  |  |
| COTL1           |         |  |  |  |  |
| MAT2A           |         |  |  |  |  |
| PEBP1           |         |  |  |  |  |
| CNPY2           |         |  |  |  |  |
| TCEB2           |         |  |  |  |  |
| BOLA2           |         |  |  |  |  |
| MDH2            |         |  |  |  |  |
| SHMT1           |         |  |  |  |  |
| YWHAQ           |         |  |  |  |  |
| DUT             |         |  |  |  |  |
| FABP5           |         |  |  |  |  |
| NANS            |         |  |  |  |  |

|          |  |  |  |  |  |
|----------|--|--|--|--|--|
| LMNB1    |  |  |  |  |  |
| HPRT1    |  |  |  |  |  |
| YWHAB    |  |  |  |  |  |
| WDR1     |  |  |  |  |  |
| PPP1CC   |  |  |  |  |  |
| CALU     |  |  |  |  |  |
| ADH5     |  |  |  |  |  |
| NUDT1    |  |  |  |  |  |
| KRT9     |  |  |  |  |  |
| ACYP1    |  |  |  |  |  |
| ATIC     |  |  |  |  |  |
| MAP4     |  |  |  |  |  |
| TXNDC17  |  |  |  |  |  |
| IDH1     |  |  |  |  |  |
| PPIL3    |  |  |  |  |  |
| TFF1     |  |  |  |  |  |
| RCC2     |  |  |  |  |  |
| B2M      |  |  |  |  |  |
| RNPEP    |  |  |  |  |  |
| DTD2     |  |  |  |  |  |
| PTRHD1   |  |  |  |  |  |
| TMSB10   |  |  |  |  |  |
| YTHDF2   |  |  |  |  |  |
| GSTO1    |  |  |  |  |  |
| PLEC     |  |  |  |  |  |
| ACLY     |  |  |  |  |  |
| MVD      |  |  |  |  |  |
| ENOPH1   |  |  |  |  |  |
| PSAT1    |  |  |  |  |  |
| PSMB1    |  |  |  |  |  |
| VAPB     |  |  |  |  |  |
| TALDO1   |  |  |  |  |  |
| IMPA1    |  |  |  |  |  |
| DYNC1LI2 |  |  |  |  |  |
| UFC1     |  |  |  |  |  |
| NPEPPS   |  |  |  |  |  |
| CBR1     |  |  |  |  |  |
| VCL      |  |  |  |  |  |
| PEPD     |  |  |  |  |  |
| PROCR    |  |  |  |  |  |
| POLR2H   |  |  |  |  |  |
| CLIC4    |  |  |  |  |  |

|         |  |  |  |  |  |
|---------|--|--|--|--|--|
| OAT     |  |  |  |  |  |
| DPP3    |  |  |  |  |  |
| PDAP1   |  |  |  |  |  |
| PFAS    |  |  |  |  |  |
| GGCT    |  |  |  |  |  |
| BPNT1   |  |  |  |  |  |
| CPPED1  |  |  |  |  |  |
| CKMT1A  |  |  |  |  |  |
| PARK7   |  |  |  |  |  |
| BASP1   |  |  |  |  |  |
| COX17   |  |  |  |  |  |
| NR2C2AP |  |  |  |  |  |
| APEX1   |  |  |  |  |  |
| DCTPP1  |  |  |  |  |  |
| GYG1    |  |  |  |  |  |
| ACO2    |  |  |  |  |  |
| ADK     |  |  |  |  |  |
| BLVRB   |  |  |  |  |  |
| AIMP1   |  |  |  |  |  |
| HSPA8   |  |  |  |  |  |
| NPEPL1  |  |  |  |  |  |
| MSN     |  |  |  |  |  |
| HSPA5   |  |  |  |  |  |
| ACTN4   |  |  |  |  |  |
| GMFB    |  |  |  |  |  |

**Supplementary Table S3. List of proteins identified in each pathway from the untreated MCF-7 cell secretome.** 318 proteins were identified in the untreated basal MCF-7 secretome. Proteins involved in the significantly enriched pathways identified from the KEGG and Reactome databases are shown.
