# Supplementary material for: A Novel Approach for the Discovery of Biomarkers of Radiotherapy Response in Breast Cancer
Source: J Pers Med. 2021 Aug 14;11(8):796. doi: 10.3390/jpm11080796 (PMC8399231; doi:10.3390/jpm11080796)
Supplement: Supplementary file 1 [file jpm-11-00796-s001.zip › Supplementary Table S4.pdf]

| All Secreted Proteins | Secreted Proteins in the known Interactome | Metabolic Pathways | Immune | Protein Metabolism & Proteasome | RNA Processing | Translation |
|-----------------------|--------------------------------------------|--------------------|--------|---------------------------------|----------------|-------------|
| ASNS                  | RPS8                                       | ADH5               | ACTR1A | ACTR1A                          | DNAJC8         | EIF3G       |
| ASS1                  | RPL30                                      | ADK                | ANXA2  | ARF1                            | HNRNPC         | GARS        |
| RPSA                  | RPL10A                                     | AHCY               | ARF1   | ASNS                            | LSM6           | KARS        |
| PITHD1                | RPSA                                       | AKR1A1             | ARPC1B | DCTN2                           | LSM8           | MRPL12      |
| BOLA1                 | LSM6                                       | ARF1               | CAP1   | EIF3G                           | NUDT21         | RPL10A      |
| PCMT1                 | HNRNPC                                     | ASNS               | CFL1   | GARS                            | PSME2          | RPL19       |
| AHNAK                 | S100A10                                    | ASS1               | CLTA   | GNPNAT1                         | PTBP1          | RPL30       |
| MIPOL1                | COL3A1                                     | BLVRB              | COL1A1 | HNRNPC                          | RAN            | RPS8        |
| ARPC1B                | PGK1                                       | CAD                | COL3A1 | IGFBP5                          | RPL10A         | RPSA        |
| FUBP1                 | ASS1                                       | COX7C              | COTL1  | KARS                            | RPL19          | SRP14       |
| SORD                  | ESD                                        | DAK                | DAK    | MRPL12                          | RPL30          |             |
| TPD52L2               | RAN                                        | DCXR               | DCD    | NUDT14                          | RPS8           |             |
| EIF3G                 | TALDO1                                     | DNPH1              | DCTN2  | PCMT1                           | RPSA           |             |
| AHCY                  | EIF3G                                      | ESD                | FSCN1  | PFDN1                           | SUPT5H         |             |
| CLTA                  | PTBP1                                      | GAPDH              | GSTP1  | PSME2                           | THUMPD1        |             |
| HMGNA4                | SPARC                                      | GCLM               | IDH1   | RAB8A                           | XPO1           |             |
| XPO1                  | RPE                                        | GSTM3              | NIT2   | RPL10A                          |                |             |
| UBE2S                 | ZYX                                        | GSTP1              | PDXK   | RPL19                           |                |             |
| RAB8A                 | SEC22B                                     | IDH1               | PGM1   | RPL30                           |                |             |
| LSM8                  | DCTN2                                      | KARS               | PIN1   | RPS8                            |                |             |
| IGFBP5                | IDH1                                       | NAMPT              | PSME2  | RPSA                            |                |             |
| TBCB                  | COL12A1                                    | NUDT3              | RAC1   | SEC22B                          |                |             |
| SHROOM2               | GARS                                       | PDXK               | RALA   | SEC24C                          |                |             |
| SH3BGRL               | RAC1                                       | PGD                | RAP1B  | SRP14                           |                |             |
| COL1A1                | CAD                                        | PGK1               | S100A9 | TBCB                            |                |             |
| COX7C                 | TLN1                                       | PGM1               | SEC22B | TLN1                            |                |             |
| FKBP2                 | ARF1                                       | PPP1CC             | SEC24C | TRIM25                          |                |             |
| GNPNAT1               | NUDT21                                     | PSME2              | SRP14  | UBE2S                           |                |             |
| SEC24C                | XPO1                                       | RAN                | TALDO1 | UCHL3                           |                |             |
| FAM129B               | ARPC1B                                     | RPE                | TRIM25 |                                 |                |             |
| NUDT21                | SRP14                                      | RPL10A             | TRIM29 |                                 |                |             |
| HDDC2                 | CXCL12                                     | RPL19              | UBE2S  |                                 |                |             |
| TLN1                  | DCXR                                       | RPL30              |        |                                 |                |             |
| TK1                   | DNAJC8                                     | RPS8               |        |                                 |                |             |
| KARS                  | PSMD13                                     | RPSA               |        |                                 |                |             |
| DNPH1                 | NIT2                                       | SEC24C             |        |                                 |                |             |
| RPS8                  | ADK                                        | SORD               |        |                                 |                |             |
| EFNB2                 | PGM1                                       | TALDO1             |        |                                 |                |             |
| C11orf54              | DAK                                        | TK1                |        |                                 |                |             |
| PSME2                 | CAP1                                       | VAPB               |        |                                 |                |             |
| ARHGAP1               | RAB8A                                      |                    |        |                                 |                |             |

|                 |                 |  |  |  |  |  |
|-----------------|-----------------|--|--|--|--|--|
| FSCN1           | ARHGAP1         |  |  |  |  |  |
| AKR1A1          | UBE2D3          |  |  |  |  |  |
| DNAJC8          | ACTR1A          |  |  |  |  |  |
| CSRP1           | FAM49B          |  |  |  |  |  |
| KRT7            | EFNB2           |  |  |  |  |  |
| VPS29           | CFL1            |  |  |  |  |  |
| DCTN2           | SUPT5H          |  |  |  |  |  |
| CD3EAP          | FKBP2           |  |  |  |  |  |
| RPL10A          | EIF6            |  |  |  |  |  |
| NAP1L4          | AHNAK           |  |  |  |  |  |
| C20orf27        | GSTP1           |  |  |  |  |  |
| GSTM3           | GAPDH           |  |  |  |  |  |
| MRPL12          | PGD             |  |  |  |  |  |
| CFL1            | ENSG00000196689 |  |  |  |  |  |
| WIBG            | ADH5            |  |  |  |  |  |
| THUMPD1         | CLIC1           |  |  |  |  |  |
| S100A9          | COX7C           |  |  |  |  |  |
| LGALS8          | FUBP1           |  |  |  |  |  |
| NAA50           | YBX3            |  |  |  |  |  |
| YBX3            | WDR1            |  |  |  |  |  |
| TRIM29          | PPP1CC          |  |  |  |  |  |
| S100A10         | EIF2A           |  |  |  |  |  |
| ENSG00000196689 | IGFBP5          |  |  |  |  |  |
| PGK1            | AKR1A1          |  |  |  |  |  |
| GAPDH           | PDXK            |  |  |  |  |  |
| RPL19           | RNPEP           |  |  |  |  |  |
| EIF6            | SEC24C          |  |  |  |  |  |
| ZYX             | ANXA2           |  |  |  |  |  |
| TATDN1          | CD3EAP          |  |  |  |  |  |
| NAMPT           | CSRP1           |  |  |  |  |  |
| COTL1           | WIBG            |  |  |  |  |  |
| NUDT14          | PIN4            |  |  |  |  |  |
| PAWR            | GCLM            |  |  |  |  |  |
| CLEC3B          | C11orf54        |  |  |  |  |  |
| DCD             | NUDT3           |  |  |  |  |  |
| FAM49B          | PFDN1           |  |  |  |  |  |
| HDHD2           | DKK1            |  |  |  |  |  |
| COL3A1          | VAPB            |  |  |  |  |  |
| MCAM            | PDCD6IP         |  |  |  |  |  |
| PDCD6IP         | MRPL12          |  |  |  |  |  |
| PDXK            | TK1             |  |  |  |  |  |
| MAP7            | ABRACL          |  |  |  |  |  |
| DCXR            | COTL1           |  |  |  |  |  |

|                 |         |  |  |  |  |  |
|-----------------|---------|--|--|--|--|--|
| SEC22B          | KARS    |  |  |  |  |  |
| TCEA2           | MCAM    |  |  |  |  |  |
| PSMD13          | GSTM3   |  |  |  |  |  |
| NIT2            | FSCN1   |  |  |  |  |  |
| GARS            | SORD    |  |  |  |  |  |
| UBE2D3          | NAA50   |  |  |  |  |  |
| ABRACL          | LSM8    |  |  |  |  |  |
| PIN1            | UBE2S   |  |  |  |  |  |
| UCHL3           | PDLIM7  |  |  |  |  |  |
| WDR1            | RPL19   |  |  |  |  |  |
| RPE             | COL1A1  |  |  |  |  |  |
| PPP1CC          | ASNS    |  |  |  |  |  |
| PIN4            | RAP1B   |  |  |  |  |  |
| ADH5            | CLTA    |  |  |  |  |  |
| GSTP1           | PSME2   |  |  |  |  |  |
| OVCA2           | AHCY    |  |  |  |  |  |
| TP53I3          | TRIM25  |  |  |  |  |  |
| CXCL12          | RALA    |  |  |  |  |  |
| GCLM            | MGMT    |  |  |  |  |  |
| C12orf5         | TCEA2   |  |  |  |  |  |
| RAC1            | PIN1    |  |  |  |  |  |
| IDH1            | SUB1    |  |  |  |  |  |
| CAD             | C12orf5 |  |  |  |  |  |
| SAFB2           | CORO1B  |  |  |  |  |  |
| ESD             | PCNP    |  |  |  |  |  |
| CLIC1           | UBQLN1  |  |  |  |  |  |
| PTBP1           | SH3BGRL |  |  |  |  |  |
| MGMT            | HDHD2   |  |  |  |  |  |
| CAP1            | S100A14 |  |  |  |  |  |
| SRP14           | NAP1L4  |  |  |  |  |  |
| ARF1            | NAMPT   |  |  |  |  |  |
| DAK             | PITHD1  |  |  |  |  |  |
| RNPEP           | NUDT14  |  |  |  |  |  |
| PDLIM1          | PCMT1   |  |  |  |  |  |
| HNRNPC          | SUMO3   |  |  |  |  |  |
| LSM6            | S100A9  |  |  |  |  |  |
| COL12A1         |         |  |  |  |  |  |
| ENSG00000243667 |         |  |  |  |  |  |
| EIF2A           |         |  |  |  |  |  |
| SUMO3           |         |  |  |  |  |  |
| PCNP            |         |  |  |  |  |  |
| VAPB            |         |  |  |  |  |  |
| TALDO1          |         |  |  |  |  |  |

|                 |  |  |  |  |  |  |
|-----------------|--|--|--|--|--|--|
| PFDN1           |  |  |  |  |  |  |
| ENSG00000158427 |  |  |  |  |  |  |
| ACTR1A          |  |  |  |  |  |  |
| RPL30           |  |  |  |  |  |  |
| EIF4EBP2        |  |  |  |  |  |  |
| RAN             |  |  |  |  |  |  |
| LANCL1          |  |  |  |  |  |  |
| SMAP1           |  |  |  |  |  |  |
| CORO1B          |  |  |  |  |  |  |
| MT1E            |  |  |  |  |  |  |
| RAP1B           |  |  |  |  |  |  |
| XPNPEP1         |  |  |  |  |  |  |
| S100A14         |  |  |  |  |  |  |
| PGD             |  |  |  |  |  |  |
| NUDT3           |  |  |  |  |  |  |
| SUB1            |  |  |  |  |  |  |
| PDLIM7          |  |  |  |  |  |  |
| HMCN1           |  |  |  |  |  |  |
| ATXN7L3B        |  |  |  |  |  |  |
| DKK1            |  |  |  |  |  |  |
| CRABP2          |  |  |  |  |  |  |
| SPARC           |  |  |  |  |  |  |
| TRIM25          |  |  |  |  |  |  |
| ADK             |  |  |  |  |  |  |
| ANXA2           |  |  |  |  |  |  |
| BLVRB           |  |  |  |  |  |  |
| RALA            |  |  |  |  |  |  |
| SUPT5H          |  |  |  |  |  |  |
| C6orf211        |  |  |  |  |  |  |
| UBQLN1          |  |  |  |  |  |  |
| PGM1            |  |  |  |  |  |  |
| TIGAR           |  |  |  |  |  |  |

**Supplementary Table S4. List of proteins identified in each pathway from the radiation-induced breast cancer cell secretome.** Functional analysis led to the identification of 159 proteins exhibiting at least a 50% increase in secretion level following 2 Gy of radiation compared with 24 h untreated controls. Significantly enriched pathways from the KEGG and Reactome databases were identified.
